# Supplementary material
Source: PubMed Central journal article supplement (PMC3733339)
Supplement: NIHMS481834-supplement-Supplementary_Table.pdf [file NIHMS481834-supplement-Supplementary_Table.pdf]

**Supplementary Table 1: Members of the TLR4 pathway.** Putative targets for miR-200b and miR-200c associated with the MyD88-dependent and MyD88-independent pathways and their Context Score values. Predictions were based upon TargetScan ([www.targetscan.org](http://www.targetscan.org)) and miRanda ([www.microRNA.org](http://www.microRNA.org)). TargetScan lists a context score based upon the seed region, with a more negative score indicating a more perfect match <sup>52</sup>. Predictions for miR-200b and miR-200c are the same, and therefore listed together. \* Analysis of the IRAK1 3'UTR revealed a 7bp exact complementary sequence match to the miR-200b and miR-200c seed sequence, even though IRAK1 was not a predicted target in TargetScan version 6.0.

| Gene  | miR-200b and miR-200c (context score) | miR-200a (context score) | Gene | miR-200b and miR-200c (context score) | miR-200a (context score) |
|-------|---------------------------------------|--------------------------|------|---------------------------------------|--------------------------|
| TLR4  | Yes (-0.18)                           | No (NA)                  | TAK1 | No (N/A)                              | Yes (-0.13)              |
| MyD88 | Yes (-0.18)                           | No (NA)                  | TRIF | No (NA)                               | No (NA)                  |
| TRAF6 | Yes (-0.19)                           | No (NA)                  | TRAM | No (NA)                               | No (NA)                  |
| IRAK1 | Yes* (NA)                             | No (NA)                  | IRF3 | No (NA)                               | No (NA)                  |
| TAB3  | Yes (-0.37)                           | No (NA)                  |      |                                       |                          |
